# Supplementary material for: Genome-Wide Transcriptome Profiling, Characterization, and Functional Identification of NAC Transcription Factors in Sorghum under Salt Stress
Source: MDPI journal article supplement (doi:10.3390/antiox10101605), 2021-10-13
Supplement: s1 [file s1]

**Table S1.** Assembly statistics of unigenes in *Sorghum bicolor*.

|                                     | Assembled transcripts | Clustered transcripts |
|-------------------------------------|-----------------------|-----------------------|
| Number of transcripts identified    | 171,896               | 125,457               |
| Maximum contig length               | 13,459                | 13,459                |
| Minimum contig length               | 350                   | 350                   |
| Average contig length               | 1,145±1011.2          | 1,121                 |
| Median contig length                | 821.8                 | 1436                  |
| Total contigs length                | 223,458,498           | 167,467,734           |
| Total number of non-ATGC characters | 0                     | 0                     |
| Contigs ≥ 200 bp                    | 174,698               | 121,563               |
| Contigs ≥ 500 bp                    | 132,459               | 97,462                |
| Contigs ≥ 1 Kbp                     | 79,164                | 48,627                |
| Contigs ≥ 10 Kbp                    | 28                    | 19                    |
| N50 value                           | 1845                  | 1807                  |

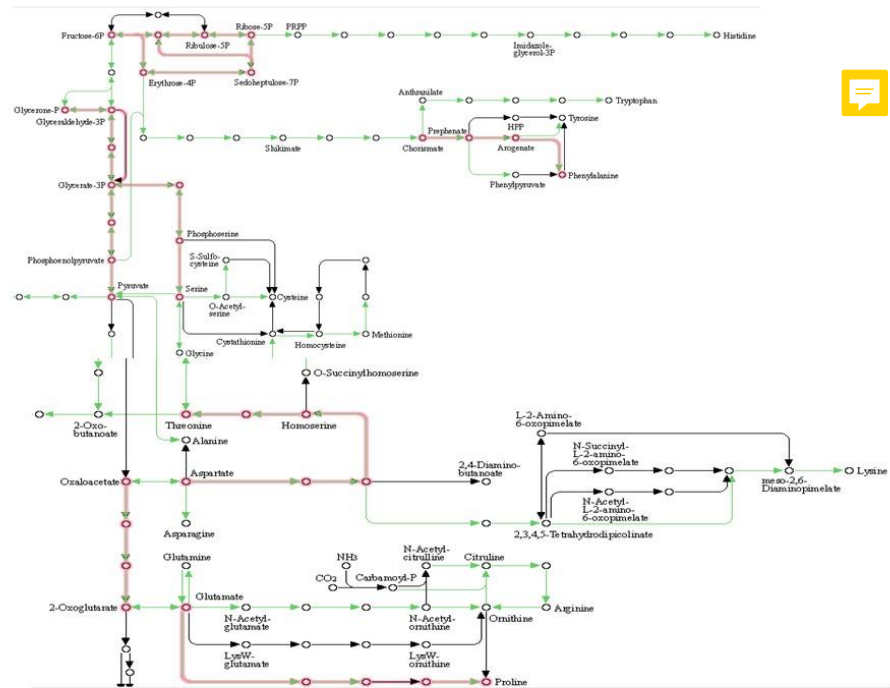

**Figure S1.** KEGG pathways of stress responsive metabolites. Pink represents highly upregulated metabolite biosynthetic pathways of the tolerant genotype and green represents those of the susceptible genotype.

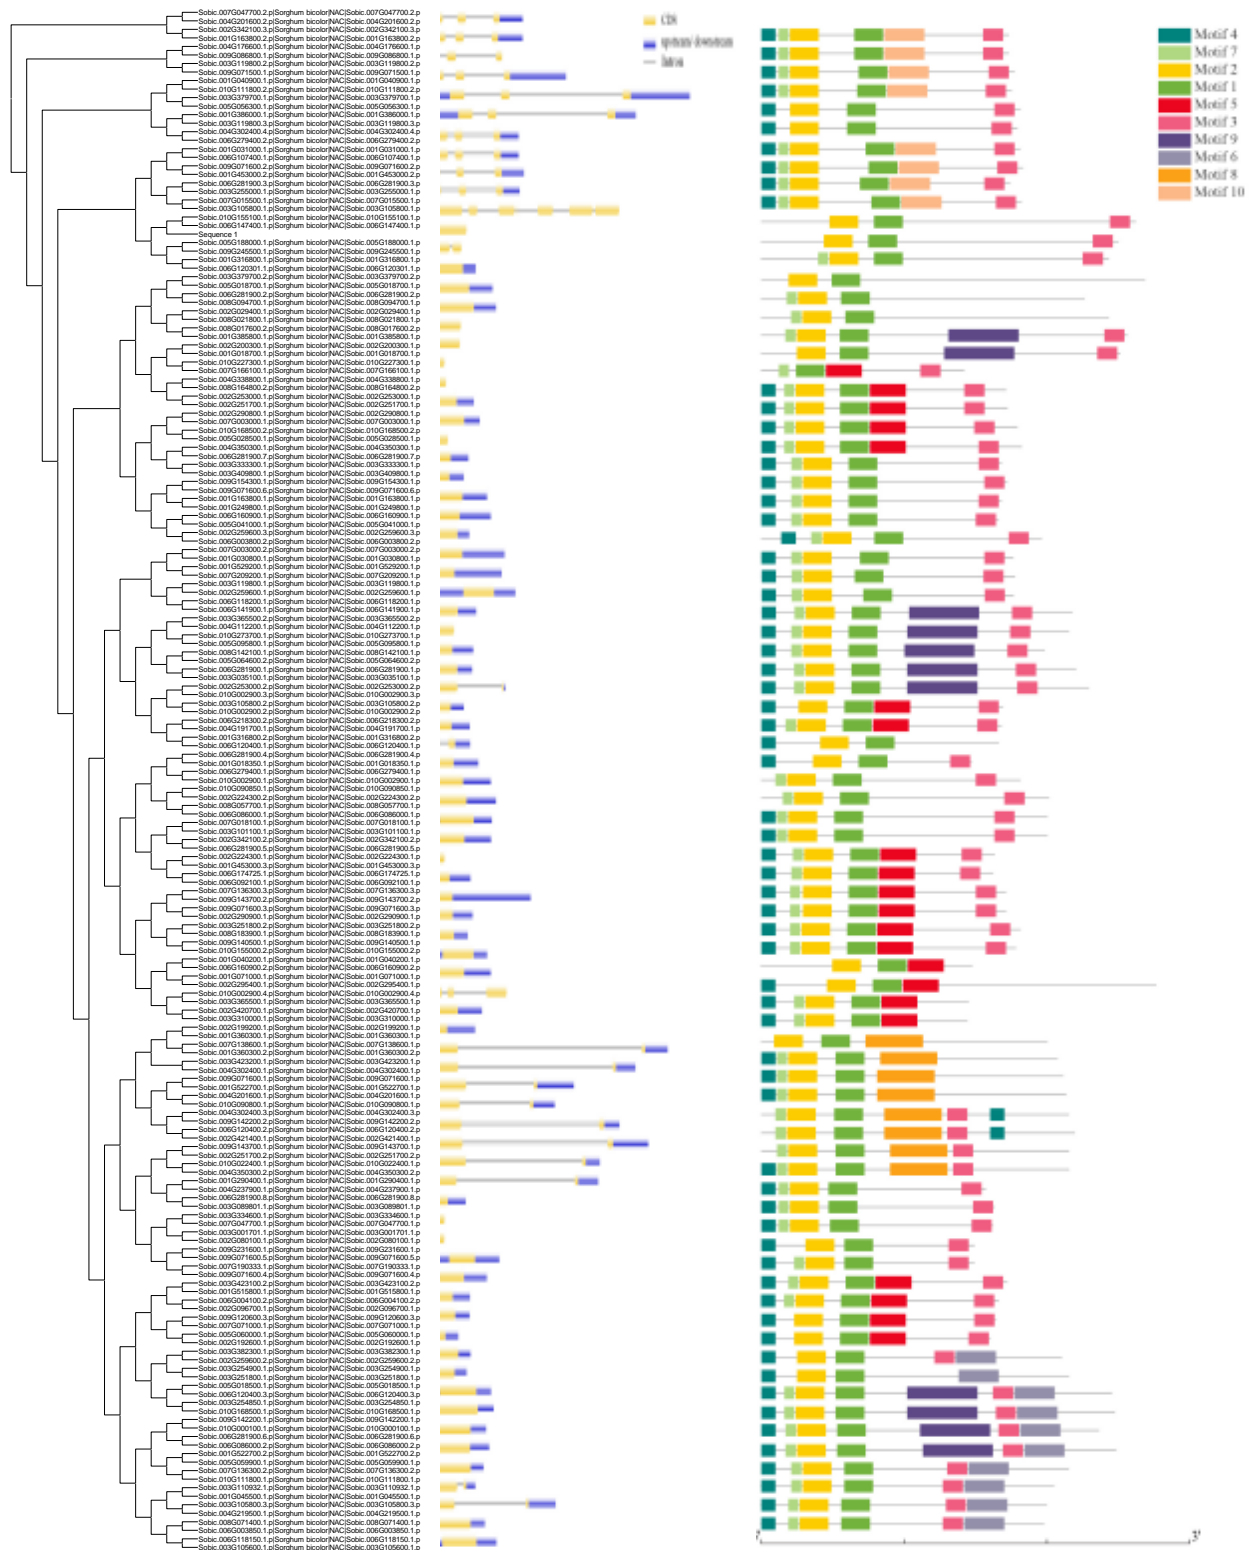

**Figure S2.** Phylogenetic relationships, gene structures, and conserved motifs of SbSNAC1 TFs. (A) Phylogenetic tree of *SbSNAC1* proteins from soybean constructed using the ML method.

(B) Exon/intron organization of *SbSNAC1* genes. Yellow boxes represent exons and black lines represent introns. The upstream/ downstream regions of *SbSNAC1* genes are indicated by blue boxes. (C) Distribution of conserved motifs in *SbSNAC1* genes.

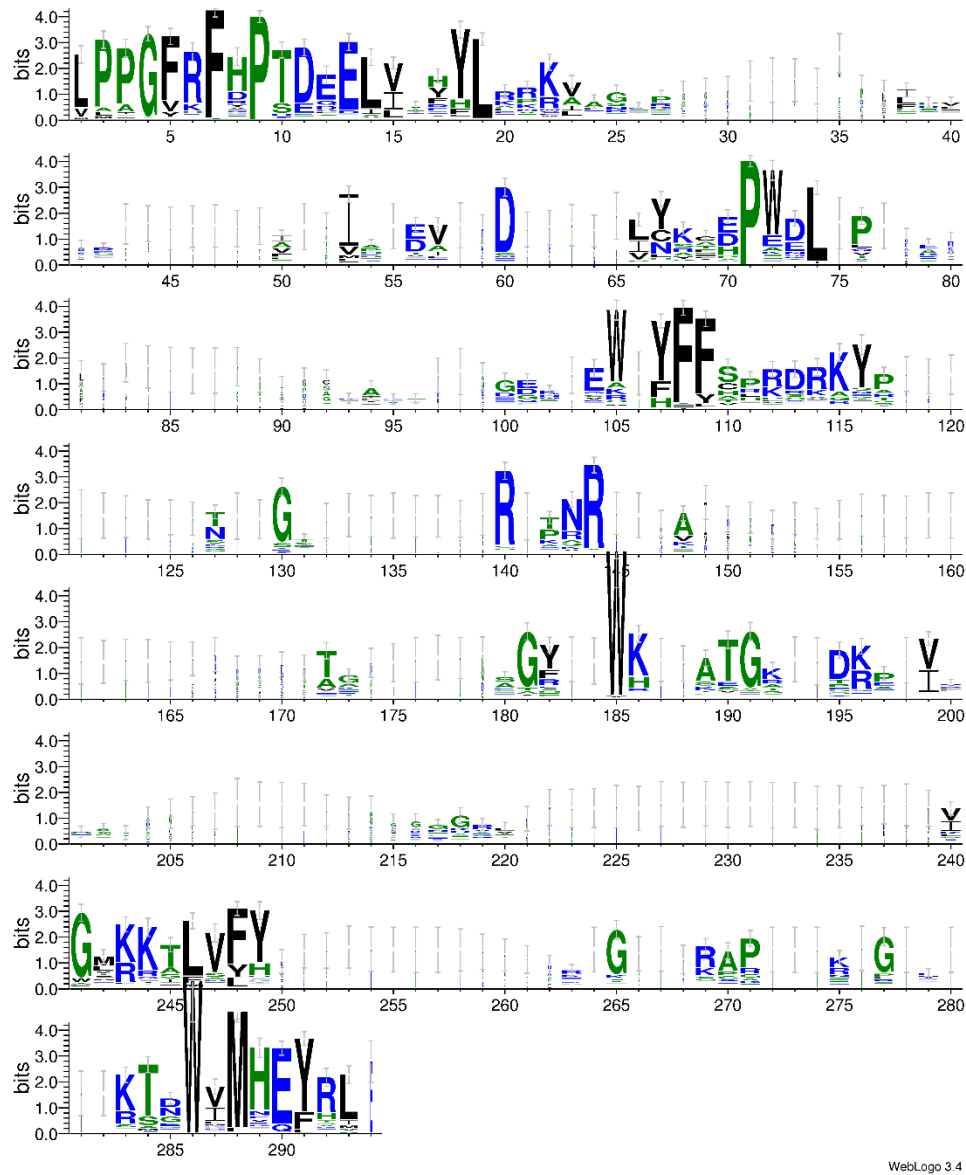

**Figure S3.** The DNA binding domain (DBD) alignment of *SbSNAC1* TFs.

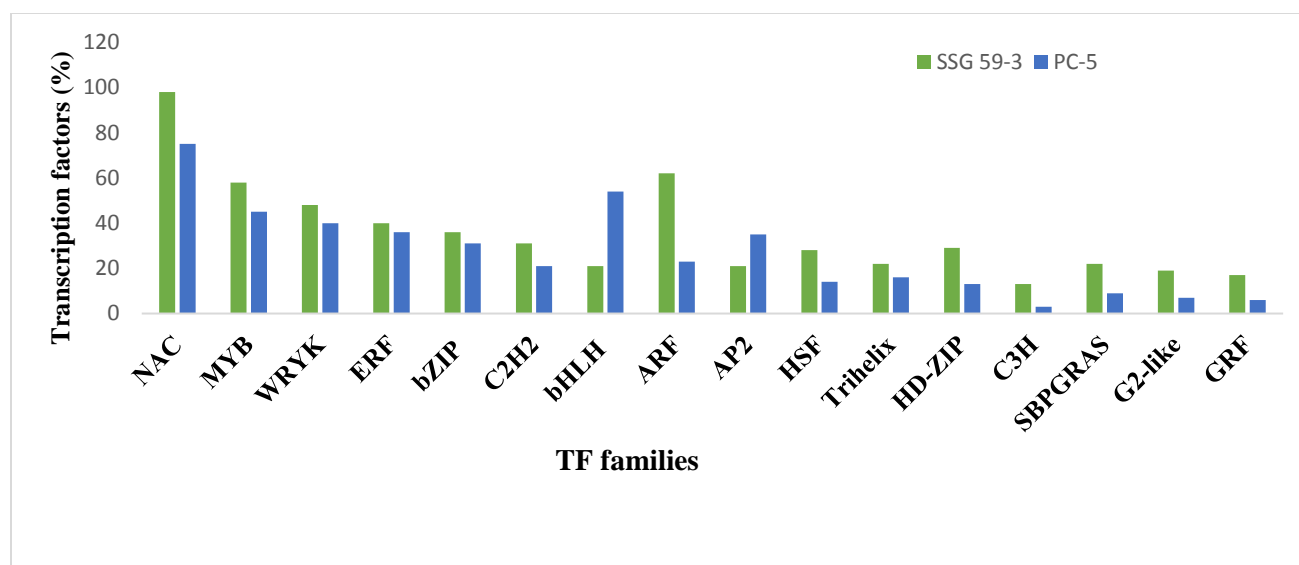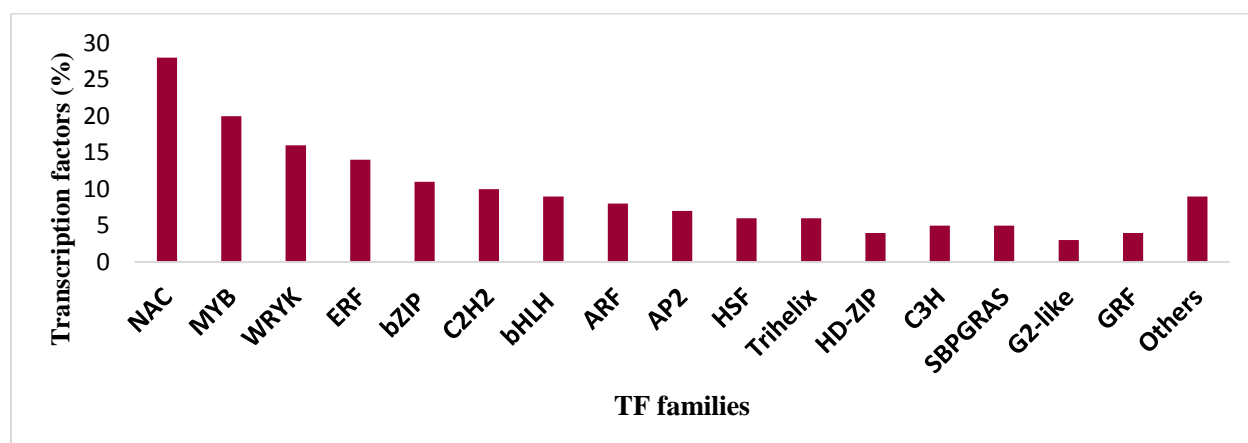

**Figure S4.** (A) Comparisons of differentially expressed transcription factors in both the tolerant and the sensitive genotype under salt stress; (B) differentially expressed transcription factor families in sorghum genotypes under salt stress.

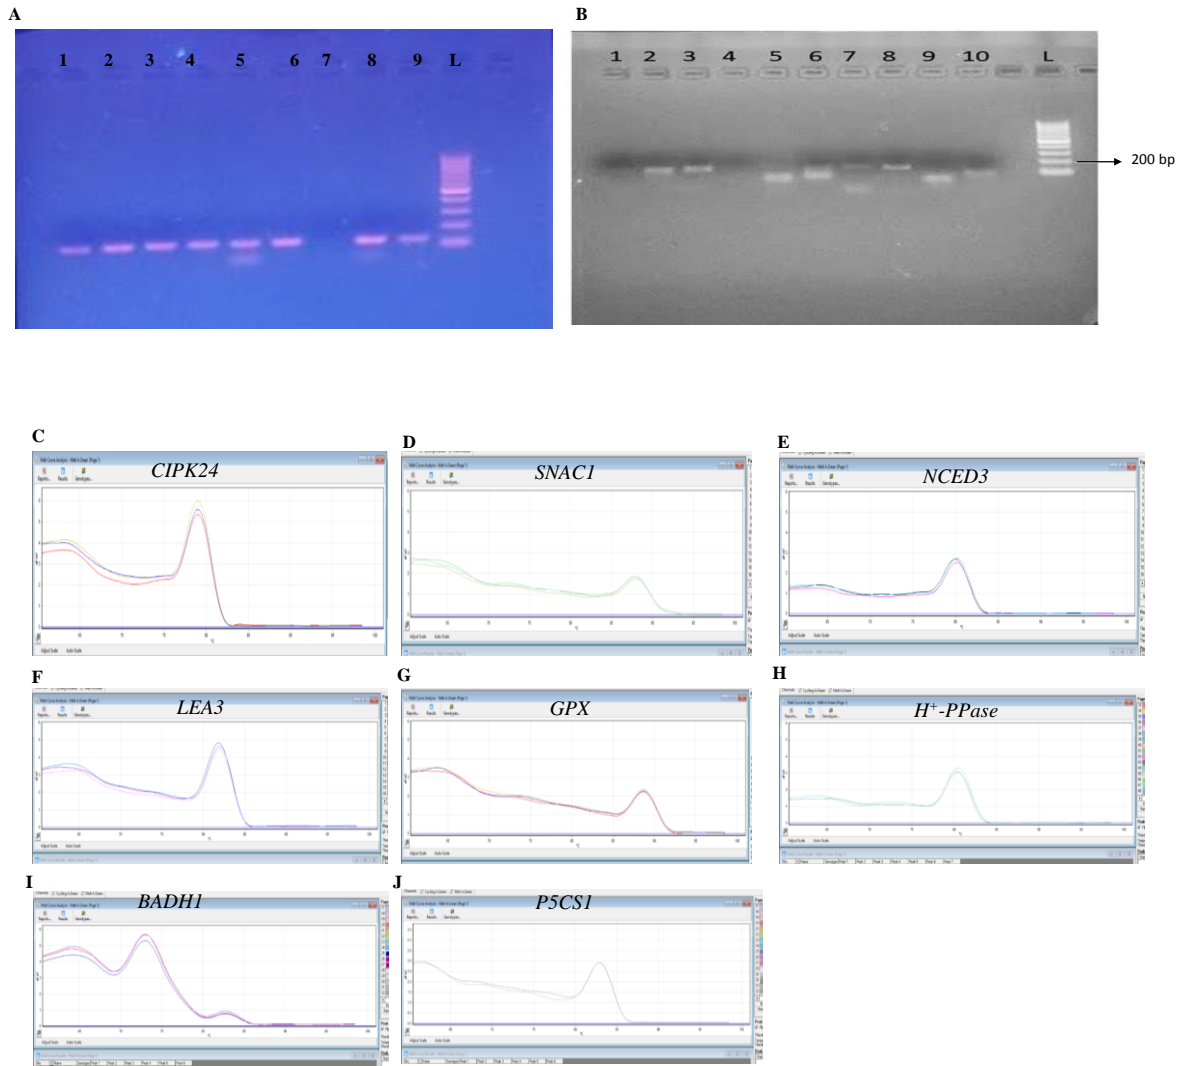

**Figure S5.** Agarose gel: (A) mRNA of salt stress-responsive genes ((1: *GPX*; 2: *LEA3*; 3: *CIPK24*; 4: *NCED3*; 5: *SNAC1*; 6: *H<sup>+</sup>-PPase*; 7: *Act*; 8: *BADH1*; 9: *P5CS1*; L: ladder), (B) PCR products of the expected sizes ( $\leq 200$ bp; 1: *Act*; 2: *LEA3*; 3: *CIPK24*; 4: *NCED3*; 5: *SNAC1*; 6: *H<sup>+</sup>-PPase*; 7: *GPX*; 8: *PP2A*; 9: *BADH1*; 10: *P5CS1*; L: ladder); (C–J) melt/dissociation curve of salt stress-responsive genes under saline conditions .

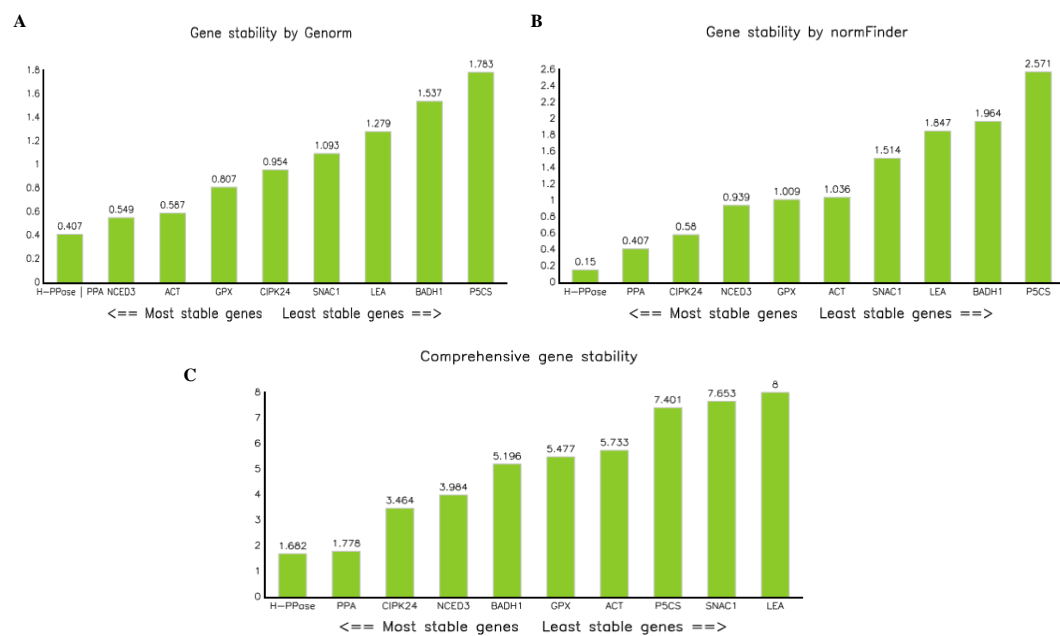

**Figure S6.** Expression stability and ranking of the salt responsive genes using: (A) geNorm, (B) NormFinder, and (C) comprehensive gene stability in *Sorghum bicolor* samples.
